# Supplementary material
Source: publisher figshare collection journal article supplement (https://acs.figshare.com/ndownloader/files/3849238)
Supplement: Supplementary file 1 [file 3849238]

## Intra- to Intermolecular Singlet Fission

### Supporting Information

M. T. Trinh,<sup>1</sup> Y. Zhong,<sup>1</sup> Q. Chen,<sup>1</sup> T. Schiros,<sup>1</sup> S. Jockusch,<sup>1</sup> M.Y. Sfeir,<sup>2</sup> M. Steigerwald,<sup>1</sup>  
C. Nuckolls,<sup>1</sup> and X-Y. Zhu<sup>1</sup>

<sup>1</sup>Department of Chemistry, Columbia University, New York, NY 10027, USA

<sup>2</sup>Center for Functional Nanomaterials, Brookhaven National Laboratory, Upton, NY 11973, USA

#### 1) Triplet sensitization experiment

Absorption spectra of DPDC<sub>7</sub> and thioxanthone (TX) in acetonitrile are shown in Fig. S1-A. Figure S1-B shows the dynamics at different wavelengths for a solution of TX (dashed curve) and a mixed solution of TX and DPDC<sub>7</sub> (solid curves). The time profile at 630 nm for TX alone (blue dashed line) shows the TX triplet decay dynamics with a time constant of 15  $\mu$ s. The lifetime of the TX triplet is shortened to 5  $\mu$ s (red line) in the mixed solution with DPDC<sub>7</sub>, indicating triplet transfer from TX to DPDC<sub>7</sub>. In this mixture, the dynamics at 520 nm (light blue) has a rise time constant of 1.8  $\mu$ s; this is assigned to the buildup time for triplet in DPDC<sub>7</sub>. The rise in absorption signal at 520 nm is mirrored by the bleaching signal at 440 nm (dark blue), with a similar time constant. It is important to note that the absorption of DPDC<sub>7</sub> is none zero at 355 nm (panel A) and singlets and subsequently biexciton (BE) are also generated in DPDC<sub>7</sub> upon photoexcitation. However the lifetime for singlet and biexciton in DPDC<sub>7</sub> in solution are very short, < 100 ps (main text). These singlet and BE features show up as a spike in Fig. S1B). There is no significant intersystem crossing observation in the solution of DPDC<sub>7</sub>.

Figure S1-C presents the ns transient absorption spectra at different delay times. At a short time delay (0.1-0.5  $\mu$ s) when the DPDC<sub>7</sub> triplet population is negligible, the absorption spectrum (blue) is mainly that for the triplet in TX. At a longer time (4-6  $\mu$ s), the DPDC<sub>7</sub> triplet population dominates and absorption represents that of the T<sub>1</sub> state in DPDC<sub>7</sub>. The T<sub>1</sub> absorption in DPDC<sub>7</sub> (red spectrum in Fig. S1-C) spans the range of ~500 nm to ~650 nm. Note that in the DPDC<sub>7</sub>, T<sub>1</sub> absorption may extend further to < 500 nm, but overlaps with the bleaching makes a quantitative assessment of T<sub>1</sub> absorption < 500 nm difficult. For comparison, we add the induced absorption

spectrum (dashed curve) for  $T_1$  in DPDC<sub>7</sub> thin film, as obtained from global fitting (see part 3). The  $T_1$  spectrum from global fitting of the DPDC<sub>7</sub> thin film (black dashed) is in excellent agreement with the sensitized spectrum from DPDC<sub>7</sub> solution.

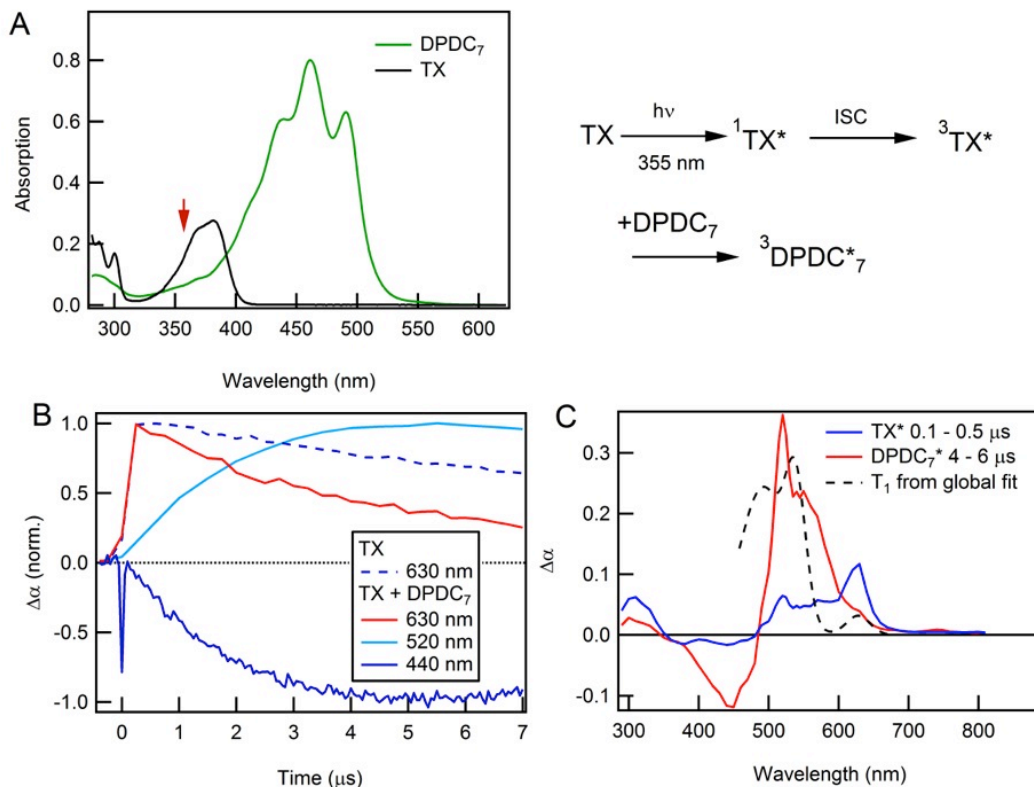

**Figure S1.** (A) Absorption spectra of DPDC<sub>7</sub> and TX in acetonitrile. The red arrow indicates the excitation wavelength for the triplet sensitization measurement. (B) Transient absorption dynamics for TX (dashed curve) and a mixture of TX and DPDC<sub>7</sub> (solid curves) at the indicated probe wavelengths. (C) Transient absorption spectra for triplet in TX (blue) and DPDC<sub>7</sub> (red). The dashed curve is the induced absorption obtained from global fit for DPDC<sub>7</sub> in solid film (Fig. 4D in main text).

## 2) Phosphorescence measurement

The phosphorescence spectrum from DPDC<sub>7</sub> is shown in Fig. 4B. Fig. S2 compares the phosphorescence spectrum from DPDC<sub>7</sub> to those from DPDC<sub>5</sub> and DPDC<sub>9</sub>. For the phosphorescence decay dynamics in the inset in Fig. 4B, we recorded time-dependent phosphorescence decay dynamics using laser pulsed excitation (355 nm, 5 ns pulse width)

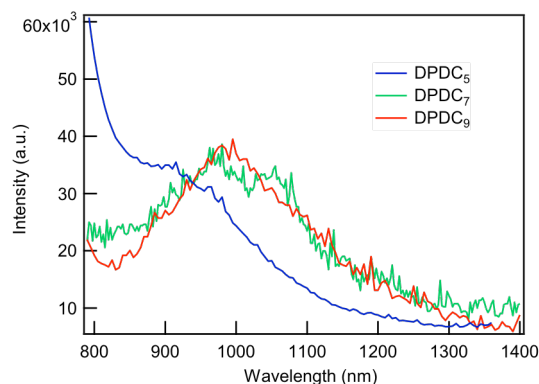

**Figure S2.** Phosphorescence spectrum from solids of DPDC<sub>5,7,9</sub> excited at 355 nm.

from a Nd:YAG laser (GCR-150-30, Spectra Physics) and a NIR sensitive PMT detector (H10330A-45, Hamamatsu).

### 3) Global fitting

We present global fitting based on the intra- to intermolecular singlet fission model presented in the Scheme 1 for the solid film, main text. Photo-excitation generates the lowest bright  $S_2$  state. The  $S_2$  exciton quickly relaxes to the dark singlet  $S_1$  state via internal conversion process and to the biexciton (BE) state via intramolecular singlet fission.<sup>1,2,3</sup> As stated in the main text, the BE is a triplet pair state that subsequently separates into two individual  $T_1$  excitons on adjacent molecules in the solid film with a time constant of  $\tau_{SF}$ .  $S_1$  and BE can decay to  $S_0$  with time constants of  $\tau_{S1}$  and  $\tau_{BE}$ , respectively.

In the global fit, we use the BE fraction,  $\gamma = [BE]/([S_1] + [BE])$ , as a fitting parameter. The resulting individual triplets are long lived (see Fig. 4A) and their population can be assumed to be constant on the time scale of interest. We assume the following spectral components: 1) GB of the  $S_0 \rightarrow S_2$  transition; 2) excited state absorption (ESA) of the singlet  $S_1$ ; and 3) ESA of the triplets. To minimize the number of variables, we do not distinguish the ESA spectra from the triplet pair on one molecule (BE) and uncorrelated triplet ( $2 \times T_1$ ).

The induced absorption or ESA dynamics in the spectral range of 700-900 nm (red circles in Fig. S4) is assigned to that of the singlet  $S_1$  decay. We use a bi-exponential function to fit  $S_1$  decay and obtain the normalized dynamics as:

$$A_S(t) = \frac{A_{01}}{A_{01} + A_{02}} e^{\frac{-t}{\tau_1}} + \frac{A_{02}}{A_{01} + A_{02}} e^{\frac{-t}{\tau_2}} = 0.75e^{\frac{-t}{2.5}} + 0.25e^{\frac{-t}{20}} \quad (S1)$$

where the time unit is in ps and the grey curve in Figure S4 shows the fit.

The bleaching signal at wavelength  $< 560$  nm is a sum of  $S_0$  bleaching in the presence of  $S_1$  and  $T_1$  excitons, and ESA by  $S_1$  and  $T_1$  (individual or in BE). The time dependent bleaching (normalized) is given by:

$$A_B(t) = - \left[ A_S(t)(1 - \gamma) + 0.5\eta e^{\frac{-t}{\tau_{SF}}} + (\gamma - 0.5\eta)e^{\frac{-t}{\tau_{BE}}} + \eta(1 - e^{\frac{-t}{\tau_{SF}}}) \right] \quad (S2)$$

The time dependent of the ESA for triplet (normalized) is:

$$A_{IA}(t) = \sigma \left[ \beta A_S(t)(1 - \gamma) + \eta e^{\frac{-t}{\tau_{SF}}} + (2\gamma - \eta)e^{\frac{-t}{\tau_{BE}}} + \eta \left( 1 - e^{\frac{-t}{\tau_{SF}}} \right) \right] \quad (S3)$$

The dynamics for probing wavelength  $< 560$  nm is given by:

$$A(t) = C[A_B(t) + A_{IA}(t)] \quad (\text{S4})$$

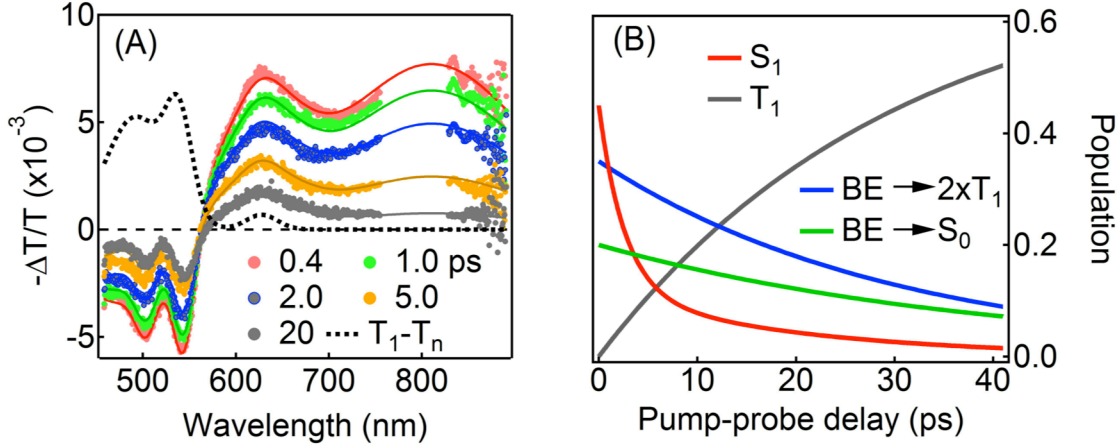

**Figure S3. Quantitative analysis of TA spectra from DPDC<sub>7</sub> thin film.** (A) Experimental TA spectra (dots) at the indicated pump-probe delays with global fits (lines) (red: 0.4 ps; green: 1 ps; blue: 2 ps; orange: 5 ps; grey: 20 ps); Dotted line is ESA of T<sub>1</sub> or BE to higher triplet state (T<sub>n</sub>) obtained from the global fits. (B) Populations of singlet S<sub>1</sub> (red), triplet T<sub>1</sub> (grey), multi-exciton (blue & green for the portions converting to triplets or decay to the ground state, respectively).

where  $C$  is a fitting constant;  $\gamma$  is the fraction of BE given above;  $\eta$  is singlet fission yield;  $\sigma$  is the ratio of T<sub>1</sub> ESA to S<sub>0</sub> bleaching at a certain wavelength in the presence of a triplet exciton;  $\beta$  is a fraction ESA by singlet S<sub>1</sub>, ( $\sigma > 0, \beta \geq 0$ ).

We use a sum of Gaussians to represent each spectral feature and the time dependent spectra is given by

$$S(t, \lambda) = A_B(t) \sum_{i=1}^3 A_i e^{-\left(\frac{\lambda - \lambda_i}{w_i}\right)^2} + A_{IA}(t) \sum_{i=4}^6 A_i e^{-\left(\frac{\lambda - \lambda_i}{w_i}\right)^2} + A_S(t) \sum_{i=7}^8 A_i e^{-\left(\frac{\lambda - \lambda_i}{w_i}\right)^2} \quad (\text{S5})$$

where we use  $i = 1-3$  for S<sub>0</sub> bleaching, with the amplitudes  $A_i < 0$ ;  $i = 4-6$  for ME/T<sub>1</sub> ESA, with  $A_i > 0$ ;  $i = 7, 8$  for singlet ESA, with  $A_i > 0$ ;  $\lambda_i$  is the central wavelength of each Gaussians;  $w_i$  is the Gaussian width.

From the fitting, we obtain the following parameters ( $\gamma = 0.55$ ;  $\tau_{S1} = 2.5 \pm 0.5$  ps;  $\tau_{BE} = 40 \pm 10$  ps;  $\tau_{SF} = 30 \pm 8$  ps) and a singlet fission quantum yield of 70% (number of triplets per absorbed photon). The corresponding kinetic profiles are shown as solid curves in S3-B. Here BE

population consists of two parts: one portion (green) decays back to  $S_0$  via  $S_2$  and the other (blue) separates into two triplets. The fitting result (grey dashed curve in Fig. 4D, main text) accounts for the time profile of GB.

This model provides excellent fits to transient absorption spectra at all pump-probe delays, Fig. S3-A. The ESA for  $T_1$  in Fig. S3 shows that there is a small portion of the  $T_1$  ESA at  $\sim 630$  nm, which overlaps with the ESA from  $S_1$  and BE at the same wavelength. In this model, the conversion BE into  $2xT_1$  does not change the ESA spectra since the overall population of the triplet pair is a constant, but the decay of BE to  $S_0$  does show up in the dynamics at 630 nm.

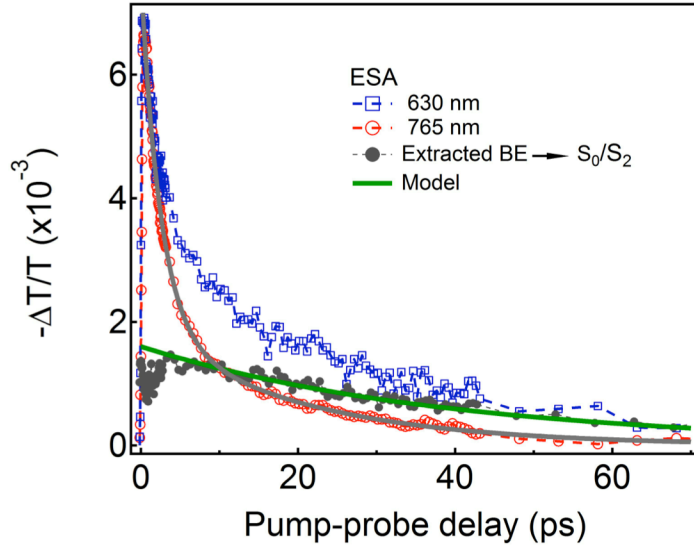

**Figure S4.** The excited state absorption (ESA) at two different peaks, probing at 630 and 765 nm, black and yellow solid lines are the fits. The black solid circles are the extracted BE  $\rightarrow S_0$  dynamics, green solid line comes from the above model.

Figure S4 shows the dynamic profiles at 630 nm and 765 nm, respectively. The dynamics at 765 nm is purely due to  $S_1$  decays to  $S_0$  (it goes to zero on a long time scale) while that at 630 nm includes residual signal due to ESA from  $T_1$ . While the  $S_1$  decay dynamics at 765 nm is described by  $A_S(t)$  in equation S1, the overlapping  $S_1$  and BE decay dynamics at 630 nm can be described by:

$$A_{S1BE}(t) = aA_S(t) + be^{\frac{-t}{\tau_{BE}}} + C_0 \quad (S6)$$

where  $C_0$  is a constant that comes from long lived triplet excitons;  $\tau_{BE}$  comes from the dynamic fitting using equation S4. From this fit we can extract the BE  $\rightarrow S_2/S_0$  decay dynamics. The extracted data for BE  $\rightarrow S_2/S_0$  decay (grey dots) is in excellent agreement with the model.

#### 4. Spectra and dynamics at a long pump-probe delay

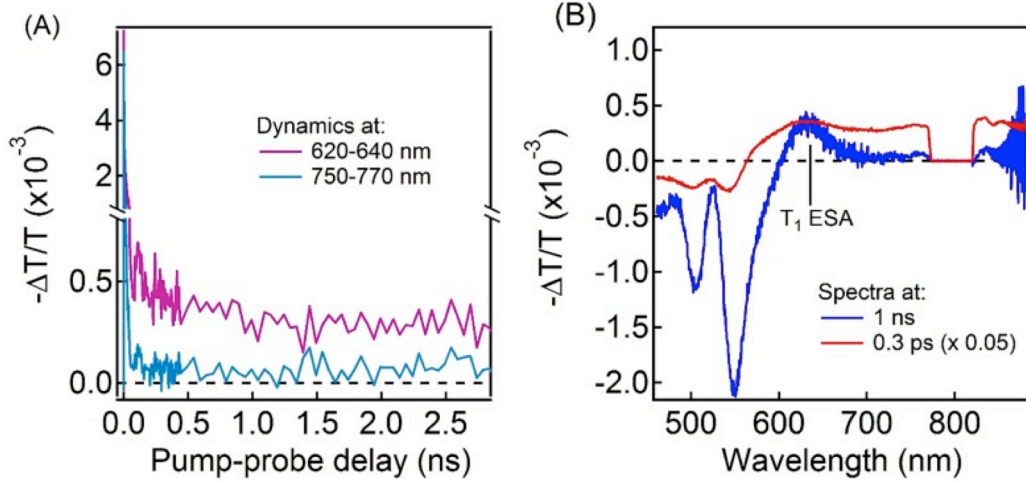

**Figure S5.** (A) Dynamics averaged from 620 to 640 nm and 750 to 770 nm for DPDC<sub>7</sub> in film, pumped at 2.75 eV. (B) Spectra at pump-probe delay of 0.3 ps (scaled by 0.05) and 1 ns. There is clear T<sub>1</sub> ESA at 630 nm for a long pump-probe delay spectrum. Note that for spectrum at 1 ns the region at the wavelength > 850 nm is noise due to weak probe intensity.

## 5. Thermal effect exclusion

One might argue that the long lived bleaching single presented in the main text may come from a thermal effect, which caused the modulation in the absorption spectrum of the solid film, as reported for poly(3-hexylthiophene)<sup>4</sup> and acenes.<sup>5,6</sup> We show the absence of this artifact in our measurements.

To describe the relationship of spectral shift and differential intensity (change of the absorption amplitude), we assume that the absorption spectrum is describe by sum of Gaussian functions. The change of amplitude,  $\Delta A$ , as a function of spectral shift,  $\Delta\lambda$ , is given by:

$$\Delta A = A_0 e^{-\left(\frac{\lambda - \lambda_i}{w_i}\right)^2} - A_0 e^{-\left(\frac{\lambda - \lambda_i - \Delta\lambda}{w_i}\right)^2} \quad (\text{S7})$$

In a small shift we can rewrite the eq (S7) as:

$$\Delta A = A_0 e^{-\left(\frac{\lambda - \lambda_i}{w_i}\right)^2} [-\Delta\lambda^2 + 2\Delta\lambda(\lambda - \lambda_i)]$$

In case  $\lambda = \lambda_i - \Delta\lambda$

$$\frac{\Delta A}{A_0} = e^{-\left(\frac{\Delta\lambda}{w_i}\right)^2} [-3\Delta\lambda^2] \quad (\text{S8})$$

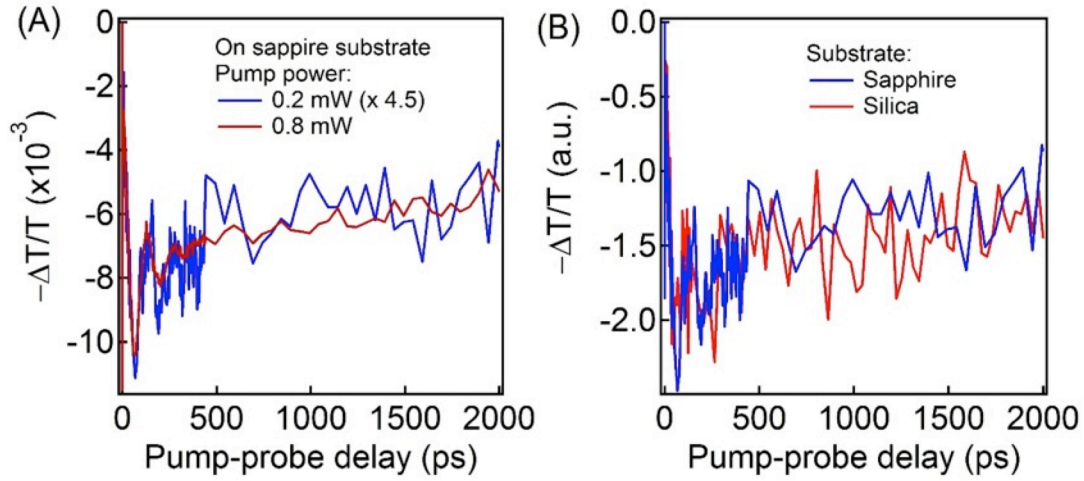

**Figure S6.** (A) Bleaching dynamics at 555 nm for DPDC<sub>7</sub> in film, pumped at 3.54 eV at 0.2 mW (blue, scaled by 4.5) and 0.8 mW (red) showing the same dynamics. (B) Bleaching dynamics at 555 nm for DPDC<sub>7</sub> on sapphire (blue) and silica (red) substrates, pumped at 3.54 eV and 0.2 mW.

Clearly that the change of the absorption amplitude is nonlinearly depending on the spectral shift, and so the excitation intensity. Figure S6 (A) shows two time profiles for the bleach signal at 555 nm for a DPDC<sub>7</sub> thin film excited at the same photon energy of 3.54 eV, but at different laser powers: 0.2 and 0.8 mW. Within experimental uncertainty, the magnitude of bleaching is proportional to the excitation laser power, but the growth and recovery dynamics are the same. Note that  $\Delta A/A_0 \sim -\Delta T/T$ . The GB recovery dynamics only depend on excitation photon energy (Fig. 5C in the main text). A thermal effect may be more pronounced in the less crystallinity samples, but we observed the same long lived GB as in the crystalline DPDC<sub>7</sub> with a weaker intensity in the less crystallinity DPDC<sub>9</sub> and in the amorphous DPDC<sub>11</sub>. In addition, we obtained the same bleaching dynamics with the sample on sapphire and silica substrates which are very different thermal conductivity, figure S6 (B). Thus, we exclude any artifact due to heating of the film.



## 6. Transient absorption spectra for different number of $\pi$ -bonds

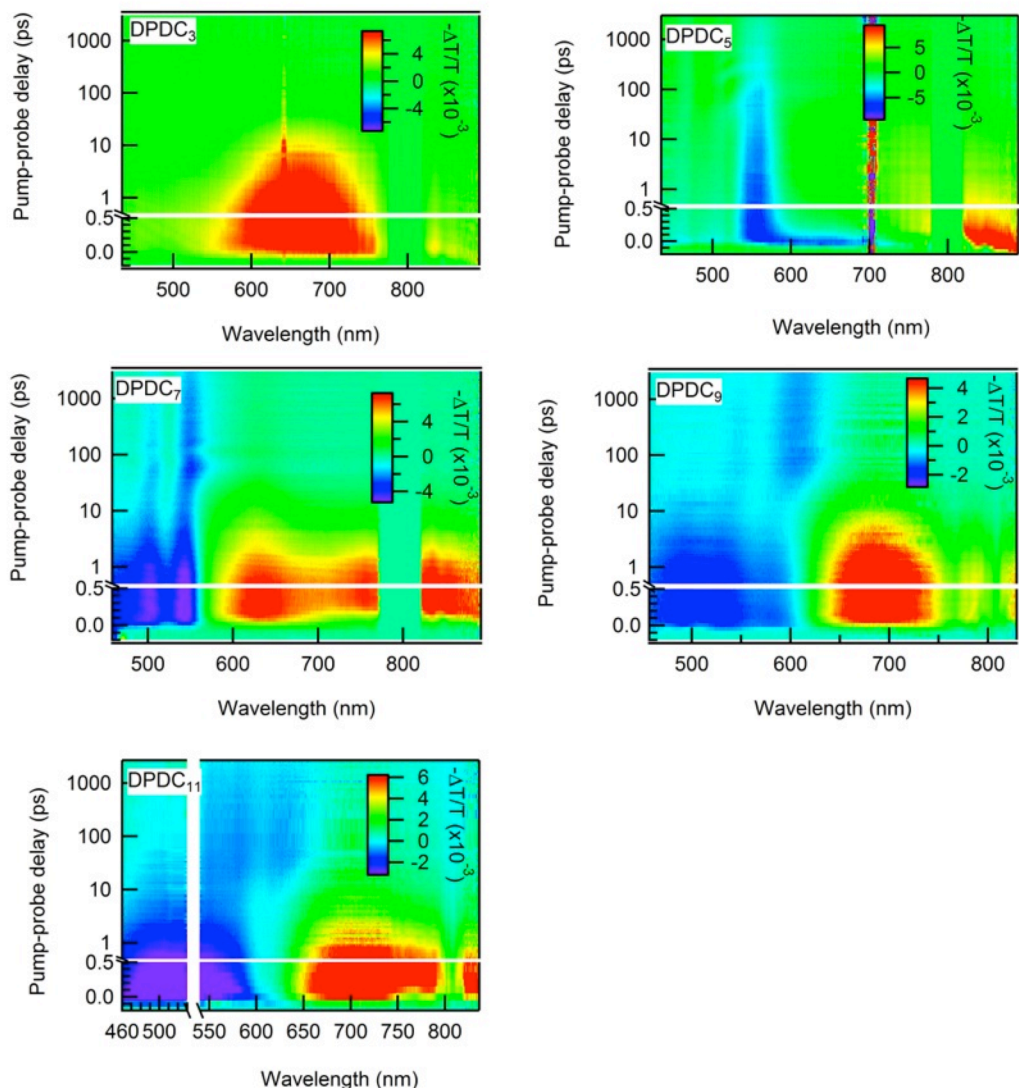

**Figure S7.** 2D pseudo-color ( $-\Delta T/T$ ) spectra as functions of probe wavelength and pump-probe delay time for  $\text{DPDC}_n$  in films with different  $n$ . The excitation wavelengths are 320 nm ( $n = 3$ ); 420 nm ( $n = 5$ ); 450 nm ( $n = 7$ ); 420 nm ( $n = 9$ ); and 525 nm ( $n = 11$ )

## 7. Time-dependent density-functional theory (TD-DFT) calculation

Across the series that we studied the energies of both  $T_1$  and  $S_2$  decrease as the number of conjugated  $\pi$ -bonds increase. Consistent with this is the observation that while the energy of the HOMO increases the energy of the LUMO remains roughly constant. The  $T_1$ - $S_2$  splitting also decreases as the number of conjugated double bonds increases. To a first approximation this



splitting is given by  $2K$ , where  $K$  is the exchange integral between the two singly-occupied orbitals. As the length of the conjugated chain increases each of the two singly-occupied orbitals that define the excited states extends over a wider area, and it is reasonable that the exchange integral between them is reduced.

Table 1. TD-DFT calculation for different number of  $\pi$ -bonds. Energy is in hartrees (h) unit, except the last two columns are in eV.

| Molecule | $E(S_0(h))$ | $E(S_2(h))$ | $E(T_1(h))$ | $E(S_2)-$<br>$E(S_0)$ | $E(T_1)-$<br>$E(S_0)$ | $E(S_2)$ (eV) | $E(T_1)$ (eV) |
|----------|-------------|-------------|-------------|-----------------------|-----------------------|---------------|---------------|
| DCDP-3   | -880.0266   | -879.9037   | -879.95332  | 0.1229                | 0.0733                | 3.3447        | 1.9933        |
| DCDP-5   | -1034.8548  | -1034.7491  | -1034.7968  | 0.1057                | 0.0580                | 2.8763        | 1.5776        |
| DCDP-7   | -1189.6724  | -1189.5800  | -1189.6234  | 0.0924                | 0.0490                | 2.5143        | 1.3334        |
| DCDP-9   | -1344.4993  | -1344.4161  | -1344.4545  | 0.0832                | 0.0448                | 2.2640        | 1.2191        |
| DCDP-11  | -1499.3210  | -1499.2458  | -1499.2802  | 0.0752                | 0.0408                | 2.0463        | 1.1116        |

## 8. Crystallinity for DPDC<sub>n</sub> films.

We investigate the crystallinity and molecular orientation of DPDC<sub>n</sub> films as a function of the number of  $\pi$ -bonds,  $n$ , using Grazing Incidence X-ray Diffraction (GIXD). The data, shown in Fig. S8, reveals a trend of crystallinity with the molecular length. The large number of distinct peaks (spots) in the 2-D reciprocal space images ordered along  $q_r$  (in the plane: parallel to the substrate) and  $q_z$  (out-of-plane: perpendicular to the substrate) for  $n = 3$  indicates that DPDC<sub>3</sub> with short chain lengths is highly crystalline and oriented. The textured diffraction rings observed for DPDC<sub>5</sub> and DPDC<sub>7</sub> also indicate good crystallinity, with smaller population of crystals with a single preferential orientation. Indeed, the degree of crystallinity decreases with increasing chain length so that by  $n \geq 9$ , the DPDC film is almost amorphous and very weak diffraction peaks are observed.

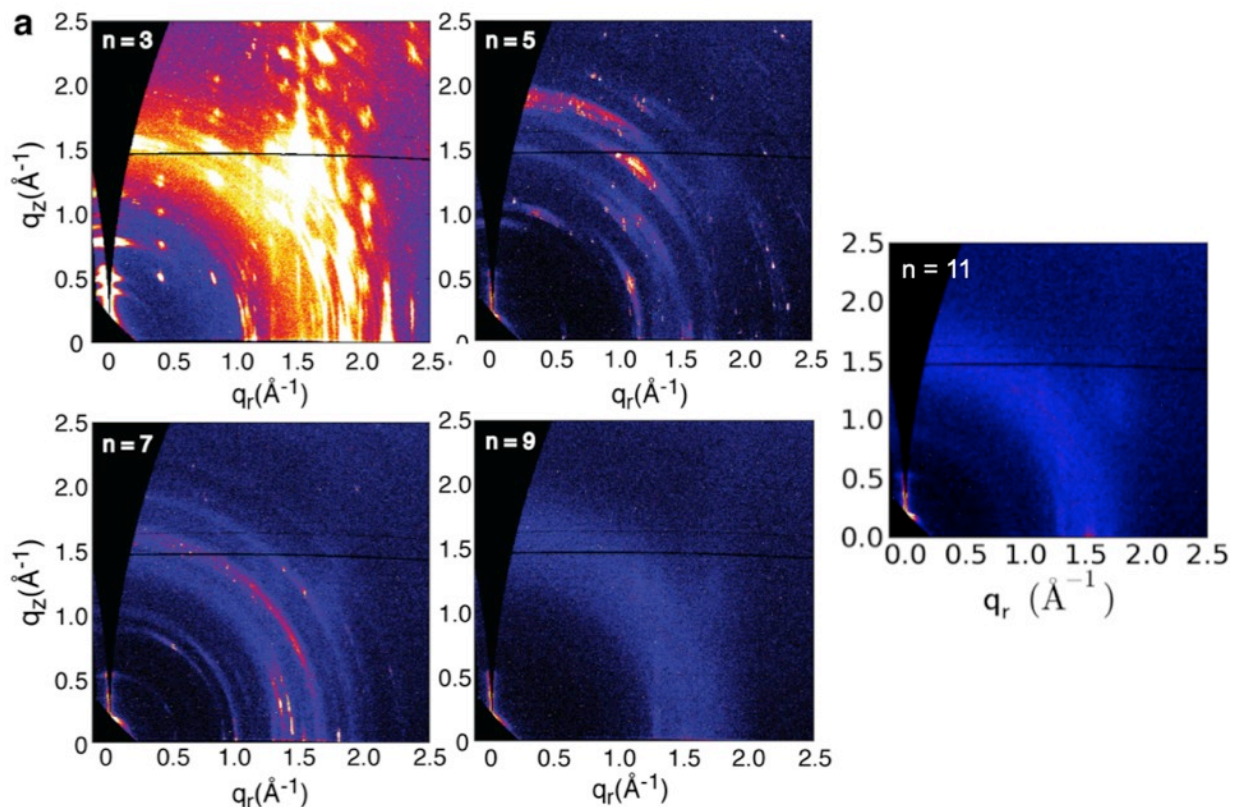

**Figure S8.** 2-D GIXD patterns, measured at an incident angle of  $0.7^\circ$ , for DPDC<sub>n</sub> films as a function of the number of  $\pi$ -bonds along the chain.

## 9. Picosecond acoustics

The  $\sim 100$  ps time scale oscillations in the TA spectra (Fig. 5C) are the well-known acoustic waves intrinsic to pulsed laser measurements on thin films.<sup>7,8</sup> The gradient in absorbed energy from the excitation laser pulse creates a strain field and launches an acoustic wave traveling perpendicular to the thin film surfaces, leading to oscillatory changes in optical properties. As expected for the acoustic wave, the time-period of the oscillation depends on film thickness. Fig.

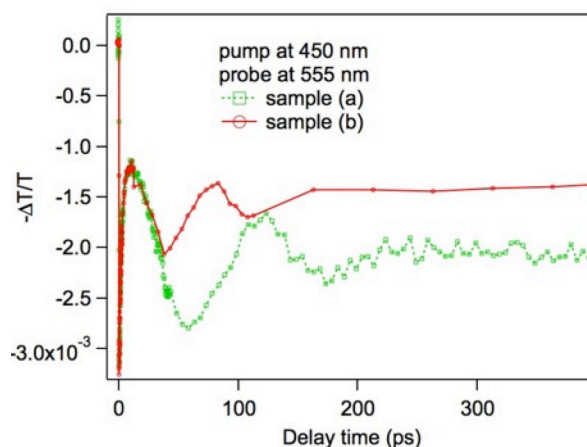

**Figure S9.** Transient absorption time profiles for two DPDC<sub>7</sub> thin film samples pumped at 450 nm and probed at 555 nm (averaged in the range of 550 to 560 nm). Sample (b) is thinner than (a) as seen from optical density.

S9 shows time profiles of the ground state bleaching signal probed at 555 nm for two DPDC<sub>7</sub>

thin film samples. Here sample (b) is thinner than sample (a) as determined visually from the optical density. The time periods of the oscillation are  $\sim 120$  ps and  $\sim 60$  ps in samples (a) and (b), respectively.

## 10. Chirp correction

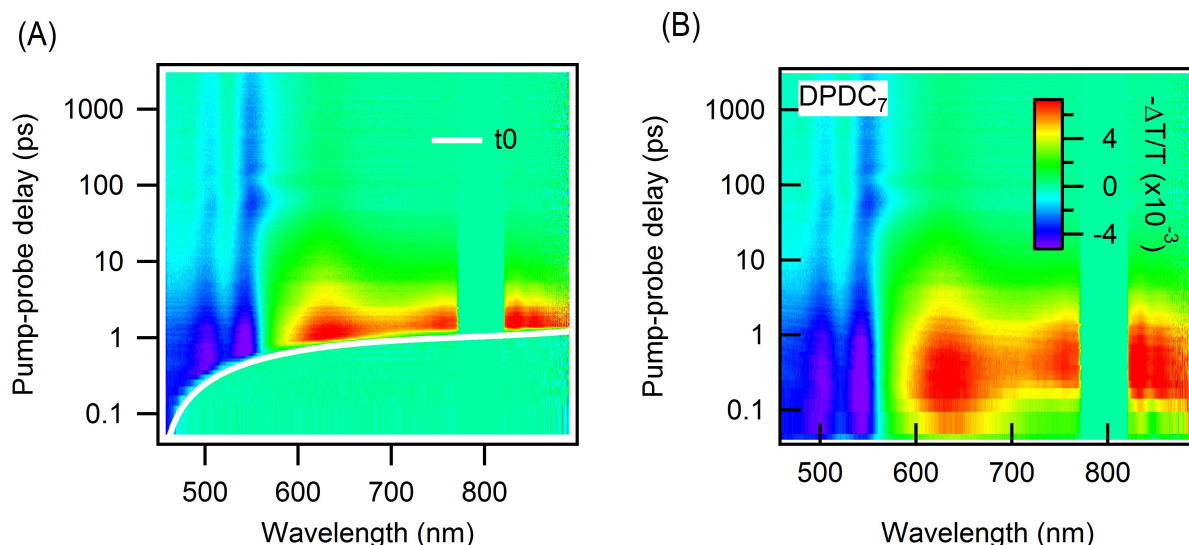

**Figure S10.** 2D pseudo-color ( $-\Delta T/T$ ) spectra as functions of probe wavelength and pump-probe delay time before (A) and after (B) chirp correction.  $t_0$  in (A) is the chirp response as a function of probe wavelength.  $t_0$  was obtained from a reference sample with a strong signal in the probe range. Note that the plots are in log scale.

## References

1. Gradinaru, C. C. et al. *Proc. Natl. Acad. Sci. U.S.A.* **2001**, 98, 2364–2369.
2. Gradinaru, C. C. Kennis, J. T. M., van Stokkum, I. H. M., Cogdell, R. J. & van Grondelle, R. *Proc. Natl. Acad. Sci. U.S.A.* **2002**, 99, 6017-6022.
3. Antognazza, M. R.; L  er, L.; Polli, D.; Christensen, R. L.; Schrock, R. R.; Lanzani, G.; Cerullo, G. *Chem. Phys.* **2010**, 373, 115.
4. Albert-Seifried, S.; Friend, R. H. *App. Phys. Lett.* **2011**, 98, 223304
5. Rao, A. et al. *Phys. Rev. B.* **2011**, 84, 195411.
6. Wilson, M. W. B. et al. *J. Am. Chem. Soc.* **2013**, 135, 16680–16688
7. Kanner, G. S., Vardeny, Z. V. & Hess, B. C. *Phys. Rev. B* **1990**, 42, 5403-5406.
8. Thomsen, C., Strait, J., Vardeny, Z., Maris, H. J., Tauc, J. & Hauser, J. J. *Phys. Rev. Lett.* **1984**, 53, 989.
